# Supplementary material for: Influence of temperature on the gel electrophoresis of a pH-regulated, zwitterionic sphere
Source: Royal Society of Chemistry journal article supplement (doi:10.1039/c3sm52406j), 2013-01-01
Supplement: c3sm52406j.pdf [file c3sm52406j.pdf]

## Electronic Supplementary Information for “Importance of Temperature on the Gel Electrophoresis of a Charge-regulated, Zwitterionic Sphere”

Jyh-Ping Hsu,<sup>1,\*</sup> Chih-Hua Huang,<sup>1</sup> Shiojenn Tseng<sup>2,\*</sup>

<sup>1</sup>Department of Chemical Engineering, National Taiwan University, Taipei, Taiwan  
 10617, Tel: 886-2-23637448, Fax: 886-2-23623040

<sup>2</sup>Department of Mathematics, Tamkang University, Tamsui, Taipei, Taiwan 25137

### Scaled governing equations

In scaled forms, the equations governing the present problem can be summarized as

following:

$$\nabla^{*2}\phi_e^* = -\frac{(\kappa a)^2}{1+\alpha} [\exp(-\phi_e^*) - \exp(\alpha\phi_e^*)] \quad (\text{S1})$$

$$\nabla^{*2}\delta\phi^* = \frac{(\kappa a)^2}{1+\alpha} [(\delta\phi^* + g_1^*)\exp(-\phi_e^*) + \alpha(\delta\phi^* + g_2^*)\exp(\alpha\phi_e^*)] \quad (\text{S2})$$

$$\nabla^{*2}g_1^* - \nabla^*\phi_e^* \cdot \nabla^*g_1^* = Pe_1\mathbf{u}^* \cdot \nabla^*\phi_e^* \quad (\text{S3})$$

$$\nabla^{*2}g_2^* + \alpha\nabla^*\phi_e^* \cdot \nabla^*g_2^* = Pe_2\mathbf{u}^* \cdot \nabla^*\phi_e^* \quad (\text{S4})$$

$$\nabla^* \cdot \mathbf{u}^* = 0 \quad (\text{S5})$$

$$-\nabla^*\delta p^* + \nabla^{*2}\mathbf{u}^* + (\nabla^{*2}\phi_e^*\nabla^*\delta\phi^* + \nabla^{*2}\delta\phi^*\nabla^*\phi_e^*) - (\lambda a)^2\mathbf{u}^* = \mathbf{0} \quad (\text{S6})$$

$$n_1^* = \exp(-\phi_e^*) [1 - (\delta\phi^* + g_1^*)] \quad (\text{S7})$$

$$n_2^* = \exp(\alpha\phi_e^*) [1 + \alpha(\delta\phi^* + g_2^*)] \quad (\text{S8})$$

In these expressions,  $\nabla^* = a\nabla$ ,  $\nabla^{*2} = a^2\nabla^2$ ,  $\kappa = [\sum_{j=1}^2 n_{j0}(ez_j)^2 / \varepsilon k_B T]^{1/2}$ ,  $n_j^* = n_j / n_{j0}$ ,

$$\lambda = \sqrt{\gamma/\eta}, \quad \phi_e^* = \phi_e / \zeta_R, \quad \delta\phi^* = \delta\phi / \zeta_R, \quad g_j^* = g_j / \zeta_R, \quad \zeta_R = k_B T / z_1 e,$$

$$Pe_j = \varepsilon(k_B T / z_1 e)^2 / \mu D_j, \quad \mathbf{u}^* = \mathbf{u} / U_{\text{ref}}, \quad \delta p^* = \delta p / p_{\text{ref}}, \quad U_{\text{ref}} = \varepsilon(k_B T / z_1 e)^2 / a\mu, \text{ and}$$

$p_{\text{ref}} = \epsilon \zeta_R^2 / a^2$ .  $\kappa$  and  $Pe_j$  are the reciprocal Debye screening length and the electric Peclet number of ionic species  $j$ ,  $j=1,2$ , respectively.

### Solution procedure

Instead solving the original problem directly, it is decomposed into two sub-problems. In the first sub-problem, the particle moves with a constant velocity  $\mathbf{U}$  in the absence of  $\mathbf{E}$ , and in the second sub-problem,  $\mathbf{E}$  is applied but the particle remains fixed in the space. Solving these two sub-problems separately, and the results used to evaluate the forces acting on the particle, including the electrical force  $\mathbf{F}_E$  and the hydrodynamic force  $\mathbf{F}_H$ . The pseudo steady state condition assumed suggests that the sum of these forces vanishes, which can be applied to calculate the mobility of the particle. Let  $\mathbf{F}_i$  be the total force acting on the particle in the  $z$  direction in sub-problem  $i$  and  $F_i$  be its magnitude,  $i=1,2$ . Then  $F_1 = \chi U$  and  $F_2 = \beta E$ , where  $U$  is the particle velocity, and  $\chi$ , and  $\beta$  are and proportional constant. At pseudo steady state,  $F_1 + F_2 = 0$ , yielding  $U = -\beta E / \chi$ .

Therefore, the mobility of the particle,  $\mu_E = U/E$ , is

$$\mu_E = -\frac{\beta}{\chi} = -\frac{F_2 U}{F_1 E} \quad (\text{S9})$$

Let  $F_{Ei}$  and  $F_{Hi}$  be the  $z$  components of  $\mathbf{F}_E$  and  $\mathbf{F}_H$  in sub-problem  $i$ , respectively,  $i=1,2$ , and  $F_{Ei}^* = F_{Ei} / \epsilon \zeta_R^2$  and  $F_{Hi}^* = F_{Hi} / \epsilon \zeta_R^2$  be the corresponding scaled values. Then  $F_{Ei}^*$  and  $F_{Hi}^*$  can be evaluated by<sup>S1</sup>

$$F_{Ei}^* = \int_{\Omega_p^*} \left( \frac{\partial \phi_e^*}{\partial n} \frac{\partial \delta \phi^*}{\partial z} - \left( \frac{\partial \phi_e^*}{\partial t} \frac{\partial \delta \phi^*}{\partial t} \right) n_z \right) d\Omega_p^* \quad (\text{S10})$$

$$F_{Hi}^* = \int_{\Omega_p^*} (\boldsymbol{\sigma}^{\text{H}^*} \cdot \mathbf{n}) \cdot \mathbf{e}_z d\Omega_p^* \quad (\text{S11})$$

$\Omega_p^*$  is the dimensionless surface area of the particle scaled by  $a^2$ ;  $\partial/\partial n$  and  $\partial/\partial t$  are the rate of change with distance along the unit normal  $\mathbf{n}$  and the unit tangential  $\mathbf{t}$ , respectively;  $n_z$  is the  $z$  component of  $\mathbf{n}$ ;  $\boldsymbol{\sigma}^{\text{H}^*} = \boldsymbol{\sigma}^{\text{H}} / (\xi_R^2 / a^2)$  is the scaled shear stress tensor with  $\boldsymbol{\sigma}^{\text{H}}$  being the corresponding shear stress tensor.

### Code verification

The applicability of the solution procedure and the software adopted is verified by solving the electrophoresis of an  $\text{SiO}_2$  particle in an infinite aqueous solution for the case where  $a=20$  nm,  $\text{p}K_A=7$ ,  $\text{p}K_B=2$ ,  $C_{\text{NaCl}}=10^{-3}$  M, and  $N_{\text{total}}=5 \times 10^{-6}$  mol/m<sup>2</sup>, solved previously by Hsu and Tai.<sup>S2</sup> To simulate their conditions, a small value of 0.01 % is assumed for  $w$ . Fig. S1 shows the variation of the particle mobility with pH at three representative levels of  $T$ ; both their result and the present result are presented. This figure reveals that the performance of the present approach is satisfactory. Note that the magnitude of the present mobility is slightly smaller than that Hsu and Tai,<sup>S2</sup> which is reasonable because although the value of  $w$  assumed is small, the hydrodynamic drag acting on the particle in a gel medium is still slightly greater than that in an aqueous medium.

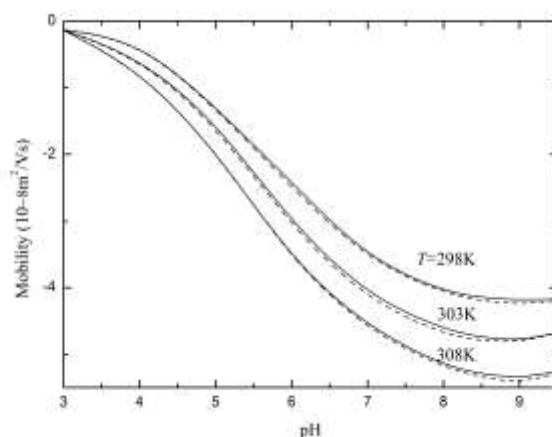

**Fig. S1** Variation of mobility with pH at various levels of  $T$  for the case where  $a=20$  nm,  $pK_A=7$ ,  $pK_B=2$ ,  $C_{NaCl}=10^{-3}$  M, and  $N_{total}=5 \times 10^{-6}$  mol/m<sup>2</sup>. Solid curve: present result at  $w=0.01$  %; dashed curve: result of Hsu and Tai ( $w=0$  %).<sup>S2</sup>

### Temperature dependence of physical properties

In our case, we assume that the temperature dependence of the relative permittivity

$\epsilon_r$  can be expressed as<sup>S3</sup>

$$\epsilon_r(T) = \exp[4.47615 - 4.60128 \times 10^{-3}(T - 237) + 2.6952 \times 10^{-7}(T - 237)^2] \quad (S12)$$

As  $T$  varies from 283 K to 323 K,  $\epsilon_r$  decreases from 83.945 to 69.879.

The expression below is assumed for the dependence of the liquid viscosity  $\eta$  on

$T$ :<sup>S4</sup>

$$\eta(T) = 883.08[(\Delta T) + 2.28 \times 10^{-3}(\Delta T)^2 - 1.14 \times 10^{-5}(\Delta T)^3 + 1.55 \times 10^{-8}(\Delta T)^4], \quad (S13)$$

where  $\Delta T = T - 225.334$ . As  $T$  increases from 283 K to 323 K,  $\eta$  decreases from 1.314 to 0.549 (m · Pa · s).

The Nernst-Haskell equation below is used for the temperature dependence of the

ionic diffusivity  $D_j$ :<sup>S5</sup>

$$D_j = \frac{RT}{F^2} \left( \frac{1/|z_j|}{1/\lambda_j^0} \right), \quad (\text{S14})$$

where  $R$  and  $\lambda_j^0$  are gas constant and the limiting conductance of ionic species  $j$ , respectively. If  $T$  is raised from 283 K to 323 K, the diffusivity of  $\text{K}^+$  increases from 1.90 to 2.17 ( $\text{m}^2/\text{s}$ ), and  $\text{Cl}^-$  from 1.90 to 2.17 ( $\text{m}^2/\text{s}$ ).

The temperature dependence of the equilibrium constant  $K_A$  can be expressed as

$$\ln K_A = -\frac{\Delta_r G}{k_B T}, \quad (\text{S15})$$

where  $\Delta_r G$  is the change in the standard Gibbs energy for the reaction expressed in eqn

(1). The  $\Delta_r G$  for the dissociation of  $\text{H}^+$  on the particle surface is ca. 13.4 kcal/mol,<sup>S6</sup>

implying that  $K_A$  increases from  $3.01 \times 10^{-8}$  to  $5.76 \times 10^{-7}$  (M) as  $T$  is raised from 283 K to 323 K.

The temperature dependence of the dissociation constant of water,  $K_w$ , can be expressed as<sup>S7</sup>

$$K_w = 8.754 \times 10^{-10} \exp\left(\frac{-1.01 \times 10^6}{T^2}\right), \quad (\text{S16})$$

where  $T$  is in K.  $K_w$  varies from  $2.92 \times 10^{-15}$  to  $5.47 \times 10^{-14}$  as  $T$  changes from 283 to 323 K.

## References

- (S1) J. P. Hsu, L. H. Yeh and M. H. Ku, *J. Colloid Interface Sci.*, 2007, **305**, 324-329.  
(S2) J. P. Hsu, Y. H. Tai and S. Tseng, *Langmuir*, 2012, **28**, 1013-1019.

(S3) B. B. Owen, C. E. Milner, R. C. Miller and H. L. Cogan, *J. Phys. Chem.*, 1961, **65**,

2065-2070.

(S4) R. C. Hardy and R. L. Cottingham, *Res. Natl. Bur. Stand.*, 1949, **42**, 573-578.

(S5) B. E. Poling, J. M. Prausnitz and J. P. O'Connell, *The Properties of Gases and*

*Liquids*, 5<sup>th</sup> ed., McGraw-Hill, New York, 2001.

(S6) J. Sefcik and W. A. Goddard, *Geochim. Cosmochim. Acta*, 2001, **65**, 4435-4443.

(S7) P. A. Stewart, *How to Understand Acid-Base*, Elsevier, New York, 1981.
